# Supplementary material
Source: bioRxiv or medRxiv preprint supplement (https://www.biorxiv.org/highwire/filestream/62929/field_highwire_adjunct_files/0/108324-1.pdf)
Supplement: Supplementary file [file 108324-1.pdf]

**Supplementary Table 1.** Novel growth medium mixtures and  $\lambda_{expected}$  for populations in the fluctuating treatment. Mixture 5, with 0.95% natal medium and 99.05% corn flour, (bold) was used in each generation for populations in the stable treatment.

| Mixture  | % Natal      | % Corn        | $\lambda_{expected}$ |
|----------|--------------|---------------|----------------------|
| 1        | 0.580        | 99.420        | 0.877                |
| 2        | 0.72         | 99.328        | 0.981                |
| 3        | 0.765        | 99.235        | 1.070                |
| 4        | 0.857        | 99.143        | 1.141                |
| <b>5</b> | <b>0.950</b> | <b>99.050</b> | <b>1.20</b>          |
| 6        | 1.042        | 98.958        | 1.245                |
| 7        | 1.135        | 98.865        | 1.282                |
| 8        | 1.228        | 98.772        | 1.311                |
| 9        | 1.320        | 98.680        | 1.333                |
| natal    | 100          | 0             | 3.36                 |

**Supplementary Table 2.** Estimates from the Bayesian hierarchical model fit for the parameters in the NBBg model. A full text file of the burned-in samples that comprise the posterior distributions of these parameters is available. Note that a smaller  $k_E$  value corresponds to a greater environmental stochasticity because it is the shape parameter of the gamma distribution. Similarly, small values of  $k_D$  correspond to a greater demographic heterogeneity.

|                              | Parameter mean | Standard deviation |
|------------------------------|----------------|--------------------|
| $R_0$                        | 1.132          | 0.0631             |
| $\alpha$                     | 0.00874        | 0.00073            |
| $k_E$ ( <i>stable</i> )      | 19.742         | 3.863              |
| $k_E$ ( <i>fluctuating</i> ) | 16.316         | 3.192              |
| $k_D$                        | 2.250          | 1.021              |

**Supplementary Table 3.** Number of experimental replicates for each combination of introduction regime and environmental variability.

|                           |             | Introduction regime |      |     |     |
|---------------------------|-------------|---------------------|------|-----|-----|
|                           |             | 20x1                | 10x2 | 5x4 | 4x5 |
| Environmental variability | Stable      | 120                 | 98   | 95  | 105 |
|                           | Fluctuating | 120                 | 96   | 101 | 107 |
